# Supplementary material
Source: Research Square preprint supplement (doi:10.21203/rs.3.rs-9748714/v1)
Supplement: Supplementary file 1 [file 19023bc5cbb604af71fb747c.docx]

**GRAPHIC ABSTRACT**

2 secretors

3 non-secretors

HBV Ag

NO SIGNIFICANT DIFFERENCE BETWEEN DISEASED AND NORMAL IN THE G428A GENE

Normal

5 SECRETORS

9 NON-SECRETORS

5 SECRETORS

6 NON-SECRETORS

HCV IgG

HCV IgM

**3 secretors**

**6 non-secretors**

DNA extraction done and G428A gene sequencing

90 participants examined for HBV AND HCV

14 +VE HCV IgG

5 +ve HCV IgM

9 +VE HBV Ag

11 -VE RESULTS

28 +VE RESULTS
